# Supplementary material for: Single step, one-pot, catalyst-free upcycling of polyethylene terephthalate into biphasic carbon dots and high-purity terephthalic acid
Source: Royal Society of Chemistry journal article supplement (doi:10.1039/d5gc01431j), 2025-01-01
Supplement: d5gc01431j1.pdf [file d5gc01431j1.pdf]

**Figure S1.** Step-by-step protocol for extraction of highly pure products

**Figure S2.** Mass Spec of TPA (A) and disodium salt of TPA (B)

**Figure S3.** Photoluminescent comparison between pure PET sheet and two different types of commercial plastic bottles

**Figure S4.** Close up TEM images of HPI (Left) and HPO (Right) CDs
