# Supplementary figures and images for: Single step, one-pot, catalyst-free upcycling of polyethylene terephthalate into biphasic carbon dots and high-purity terephthalic acid
Source: Royal Society of Chemistry journal article supplement (doi:10.1039/d5gc01431j), 2025-01-01

# Supplementary Figure 1

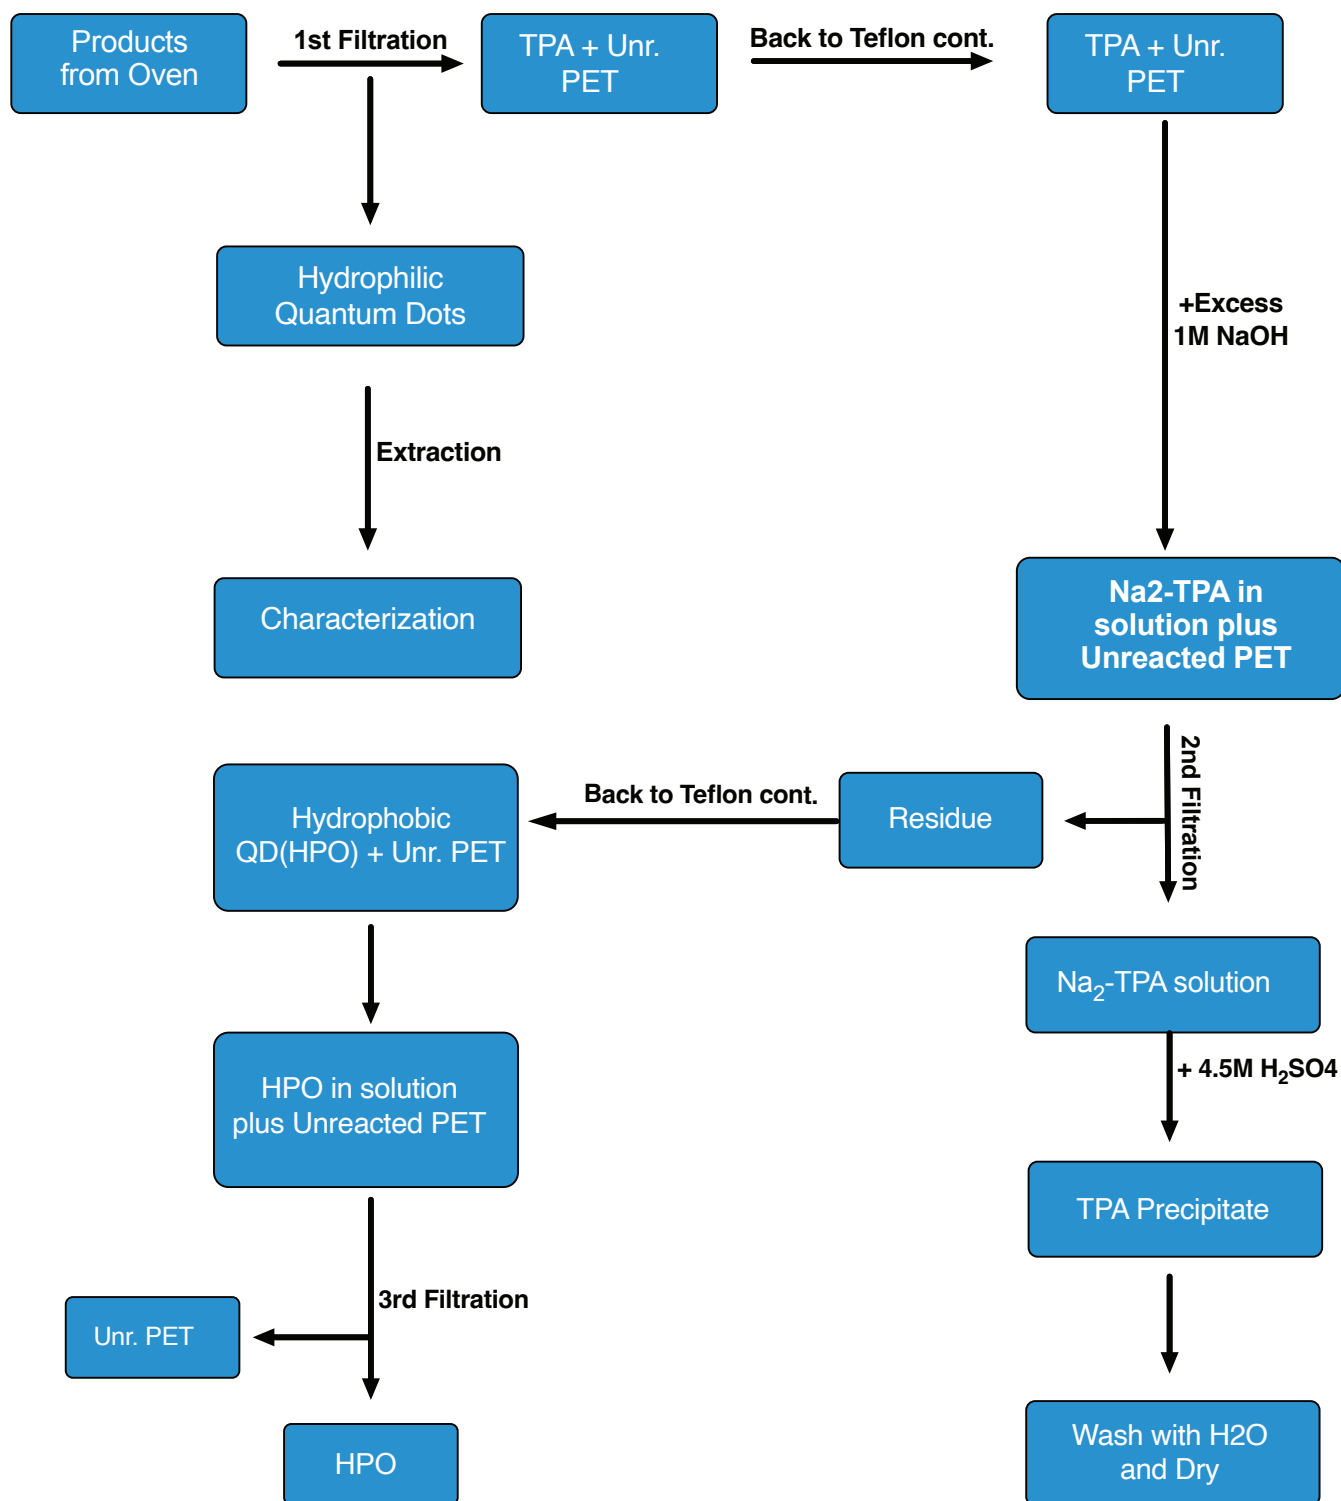



# Supplementary Figure 2

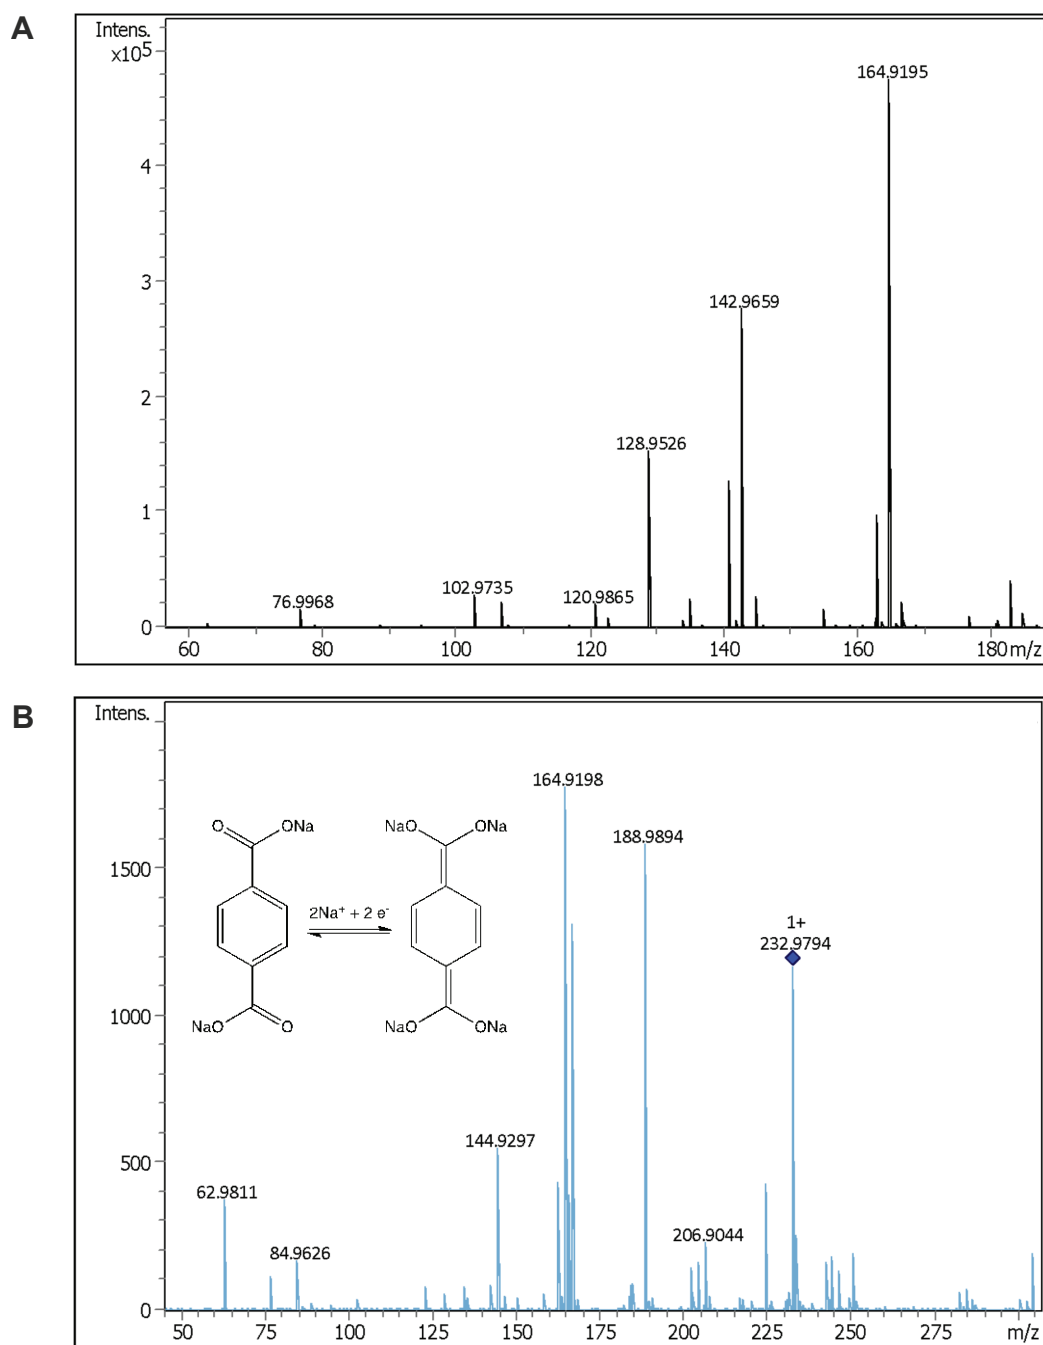



# Supplementary Figure 3

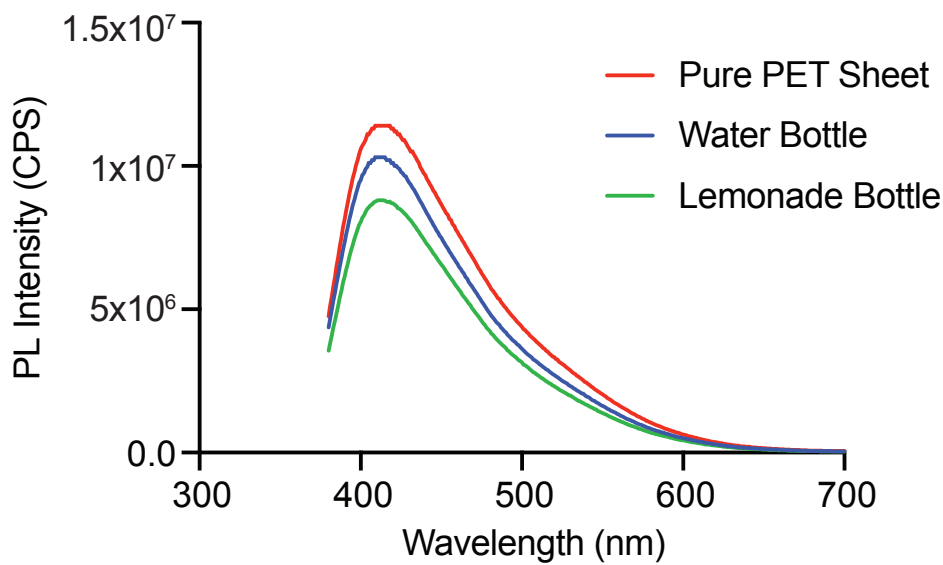



# Supplementary Figure 4

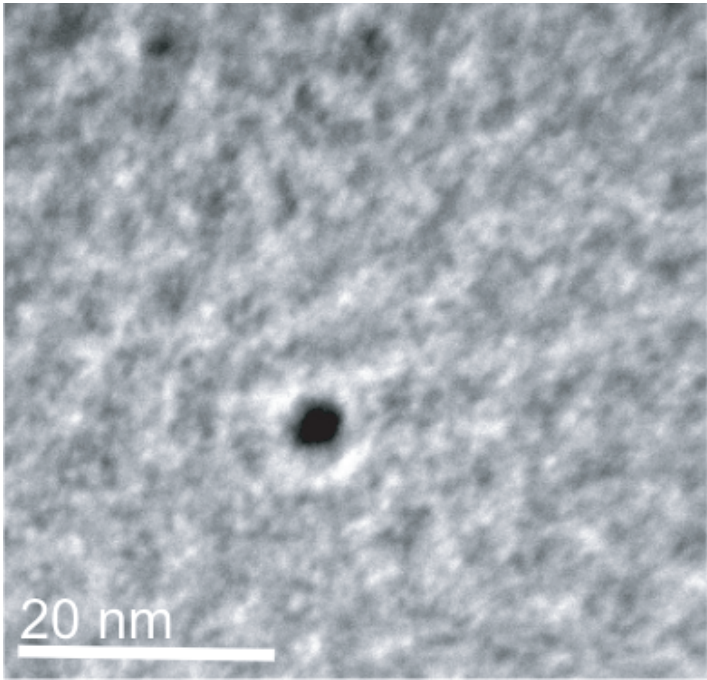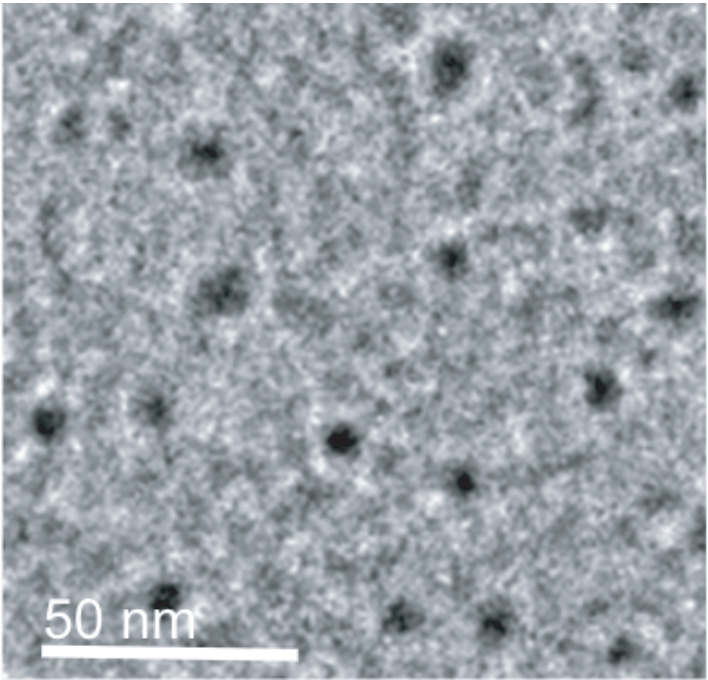

Supplement: d5gc01431j2.pdf [file d5gc01431j2.pdf]
